# Supplementary material for: Non-viral siRNA delivery vectors: dendritic molecular transporter and molecular transporter nanovectors for target gene silencing
Source: Royal Society of Chemistry journal article supplement (doi:10.1039/c0py00342e), 2010-11-18
Supplement: c0py00342e.pdf [file c0py00342e.pdf]

## **Supplemental Materials**

# **Non-viral siRNA Delivery Vectors: Dendritic Molecular Transporter and Molecular Transporter Nanovectors for Target Gene Silencing**

**Sharon K. Hamilton, Artez I. Sims, Jenna Donovan, and Eva Harth**

**Department of Chemistry, Vanderbilt University,  
7619 Stevenson Center, Nashville, Tennessee, USA.**

**Contact: [eva.harth@vanderbilt.edu](mailto:eva.harth@vanderbilt.edu)**

**Phone: 001-(1)615-343-3405**

## Detector Gain Values:

### Figure 1. Confocal imaging of untreated and siRNA-LF2000 treated HeLa cells:

**Image a and a'** : Control image:

Detector Gain: Detector Gain: Green channel - 700, DIC channel – 623

**Image b and b'**: siRNA-LF2000 image:

Detector Gain: Green channel - 700, DIC channel 308

### Figure 1. Confocal imaging of siRNA-MT (3) treated HeLa cells:

**Image A and A'** : 250 nM siRNA-MT :

Detector Gain: Green channel - 700, DIC channel - 633

**Image B and B'** : 500 nM siRNA-MT :

Detector Gain: Green channel - 700, DIC channel 633

**Image C and C'** : 750 nM siRNA-MT image:

Detector Gain: Green channel - 700, DIC channel - 638

**Image D and D'** : 1000 nM MT control image:

Detector Gain: Green channel - 700, DIC channel -549

### Figure 2. Confocal imaging of siRNA-MT-NP (5) treated HeLa cells:

**Image a and a'** : 250 nM siRNA-NP image:

Detector Gain: Green channel - 700, DIC channel - 643

**Image b and b'** : 500 nM siRNA-NP image:

Detector Gain: Green channel - 700, DIC channel 633

**Image c and c'** : 750 nM siRNA-NP image:

Detector Gain: Green channel - 700, DIC channel - 633

**Image d and d'** : 1000 nM NP control image:

Detector Gain: Green channel - 700, DIC channel 539
